# Supplementary material
Source: PubMed Central journal article supplement (PMC4865557)
Supplement: jcsm.12.5.703s1.pdf [file jcsm.12.5.703s1.pdf]

Candidate predictors considered for inclusion in the model.

| <b>Question</b>                                                                                                                                                     | <b>Response Options</b>                                                                                  |
|---------------------------------------------------------------------------------------------------------------------------------------------------------------------|----------------------------------------------------------------------------------------------------------|
| What is the level of your vision in the better eye?                                                                                                                 | LP (ref), NPL                                                                                            |
| Have either of your eyes been enucleated (removed)?                                                                                                                 | no (ref), yes                                                                                            |
| During the past month, how many hours of actual sleep did you get at night? (This may be different from the number of hours spent in bed.) Hours of sleep per night | hours, continuous                                                                                        |
| During the past month, how often have you had trouble sleeping because you cannot get to sleep within 30 minutes?                                                   | not during the past month (ref), less than once a week, once or twice a week, three or more times a week |
| Do you go through periods of good sleep and periods of bad sleep?                                                                                                   | no (ref), yes                                                                                            |
| Do you feel that your sleep pattern has changed since the deterioration of your vision?                                                                             | no (ref), yes, n/a                                                                                       |
| During the past month, how much of a problem has it been for you to show enthusiasm to get things done?                                                             | no problem at all (ref), only a very slight problem, somewhat of a problem, a very big problem           |
| During the past month, how often have you taken medicine (prescribed or “over the counter”) to help you sleep?                                                      | not during the past month (ref), less than once a week, once or twice a week, three or more times a week |
| Do you regularly wear scleral shells? <sup>2</sup>                                                                                                                  | no (ref), yes                                                                                            |
| What was your approximate age of onset of your visual loss? <sup>2</sup>                                                                                            | age, continuous                                                                                          |
| Do you fall asleep during conversations? <sup>2</sup>                                                                                                               | no (ref), rarely, often                                                                                  |
| During the past month, how long (in minutes) has it usually take you to fall asleep each night? <sup>2*</sup>                                                       | < 6 minutes, 6-19 minutes (ref), >19 minutes                                                             |
| During the past month, how often have you had trouble sleeping because you have to get up to use the bathroom? <sup>2*</sup>                                        | not during the past month (ref), less than once a week, once or twice a week, three or more times a week |
| During the past month, how often have you had trouble sleeping because you have pain? <sup>2*</sup>                                                                 | not during the past month (ref), less than once a week, once or twice a week, three or more times a week |
| During the past month, how often have you had trouble sleeping because of other reason(s)? <sup>2*</sup>                                                            | not during the past month (ref), less than once a week, once or twice a week, three or more times a week |
| During the past month, how would you rate your sleep quality overall? <sup>2*</sup>                                                                                 | very good (ref), fairly good, fairly bad, very bad                                                       |
| Have either of your eyes been enucleated (removed)? <sup>2</sup>                                                                                                    | None or one (ref), both 9                                                                                |
| During the past month, when have you usually gotten up in the morning? <sup>1*</sup>                                                                                | time, continuous                                                                                         |
| During the past month, how often have you had trouble sleeping because you wake up in the middle of the night or early morning? <sup>1*</sup>                       | not during the past month (ref), less than once a week, once or twice a week, three or more times a week |
| During the past month, how often have you had trouble sleeping because you cannot breathe comfortably? <sup>1*</sup>                                                | not during the past month (ref), less than once a week, once or twice a week, three or more times a week |

|                                                                                                                                                                                                                                 |                                                                                                                                                                       |
|---------------------------------------------------------------------------------------------------------------------------------------------------------------------------------------------------------------------------------|-----------------------------------------------------------------------------------------------------------------------------------------------------------------------|
| During the past month, how often have you had trouble sleeping because you cough or snore loudly? <sup>1*</sup>                                                                                                                 | not during the past month (ref), less than once a week, once or twice a week, three or more times a week                                                              |
| During the past month, how often have you had trouble sleeping because you feel too cold? <sup>1*</sup>                                                                                                                         | not during the past month (ref), less than once a week, once or twice a week, three or more times a week                                                              |
| During the past month, how often have you had trouble sleeping because you feel too hot? <sup>1*</sup>                                                                                                                          | not during the past month (ref), less than once a week, once or twice a week, three or more times a week                                                              |
| During the past month, how often have you had trouble sleeping because you had bad dreams? <sup>1*</sup>                                                                                                                        | not during the past month (ref), less than once a week, once or twice a week, three or more times a week                                                              |
| During the past month, how often have you had trouble staying awake while driving, eating meals, or engaging in social activity? <sup>1*</sup>                                                                                  | not during the past month (ref), less than once a week, once or twice a week, three or more times a week                                                              |
| Do you fall asleep during the day? <sup>1</sup>                                                                                                                                                                                 | never (ref), rarely, often, usually                                                                                                                                   |
| Do you have any difficulty getting up in the mornings? <sup>1</sup>                                                                                                                                                             | no (ref), yes                                                                                                                                                         |
| Is your sleep pattern cyclic? <sup>2</sup>                                                                                                                                                                                      | no (ref), yes                                                                                                                                                         |
| How often do you get up and turn on a light at night? <sup>1</sup>                                                                                                                                                              | never (ref), rarely, often, usually                                                                                                                                   |
| Do you ever skip a night's sleep? <sup>1</sup>                                                                                                                                                                                  | no (ref), yes                                                                                                                                                         |
| Is your sleep pattern different during work-free periods (e.g. vacations, weekends)? <sup>1</sup>                                                                                                                               | no (ref), yes, n/a                                                                                                                                                    |
| Does your sleep pattern affect your social or occupational life? <sup>1</sup>                                                                                                                                                   | no (ref), yes                                                                                                                                                         |
| Do you fall asleep while traveling in car/bus/train? <sup>1</sup>                                                                                                                                                               | no (ref), rarely, often                                                                                                                                               |
| Do you fall asleep while watching/listening to TV/radio? <sup>1</sup>                                                                                                                                                           | no (ref), rarely, often                                                                                                                                               |
| Do you fall asleep during meals? <sup>1</sup>                                                                                                                                                                                   | no (ref), rarely, often                                                                                                                                               |
| Do you fall asleep during meetings? <sup>1</sup>                                                                                                                                                                                | no (ref), rarely, often                                                                                                                                               |
| Do you take melatonin tablets? <sup>1</sup>                                                                                                                                                                                     | no (ref), yes                                                                                                                                                         |
| If No, have you taken melatonin tablets in the past? <sup>1</sup>                                                                                                                                                               | no (ref), yes                                                                                                                                                         |
| During the past month, when have you usually gone to bed at night? <sup>1</sup>                                                                                                                                                 | time, continuous                                                                                                                                                      |
| You may have heard about “morning” and “evening” type people who prefer to do physical, difficult or concentrated tasks at particular times of the day. Which one of these types do you consider yourself to be? <sup>1**</sup> | definitely a “morning” type, rather more a “morning” than an “evening” type/rather more an “evening” than a “morning” type (ref), definitely an “evening” type?<br>23 |

<sup>1</sup> Removed, because this predictor was not selected in the first round

<sup>2</sup> Removed, because this predictor was not selected in the second round

\* Component in the Pittsburgh Sleep Quality Index

\*\* Component in the Horne Oostberg Questionnaire
